# Supplementary material for: First synthesis of 2-(benzofuran-2-yl)-6,7-methylene dioxyquinoline-3-carboxylic acid derivatives
Source: publisher site journal article supplement (doi:10.3762/bjoc.7.28), 2011-02-15
Supplement: Additional file 1 [file 1860-5397-7-28-S1.pdf]

# Supporting Information

for

## First synthesis of 2-(benzofuran-2-yl)-6,7-methylene dioxiquinoline-3-carboxylic acid derivatives

Wentao Gao\*, Jia Liu, Yun Jiang and Yang Li

Address: Institute of Superfine Chemicals, Bohai University, Jinzhou 121000, China

Email: Wentao Gao - bhuzh@163.com

\* Corresponding author

**<sup>1</sup>H NMR and <sup>13</sup>C NMR spectra of the title compounds 5 and 3a–h**

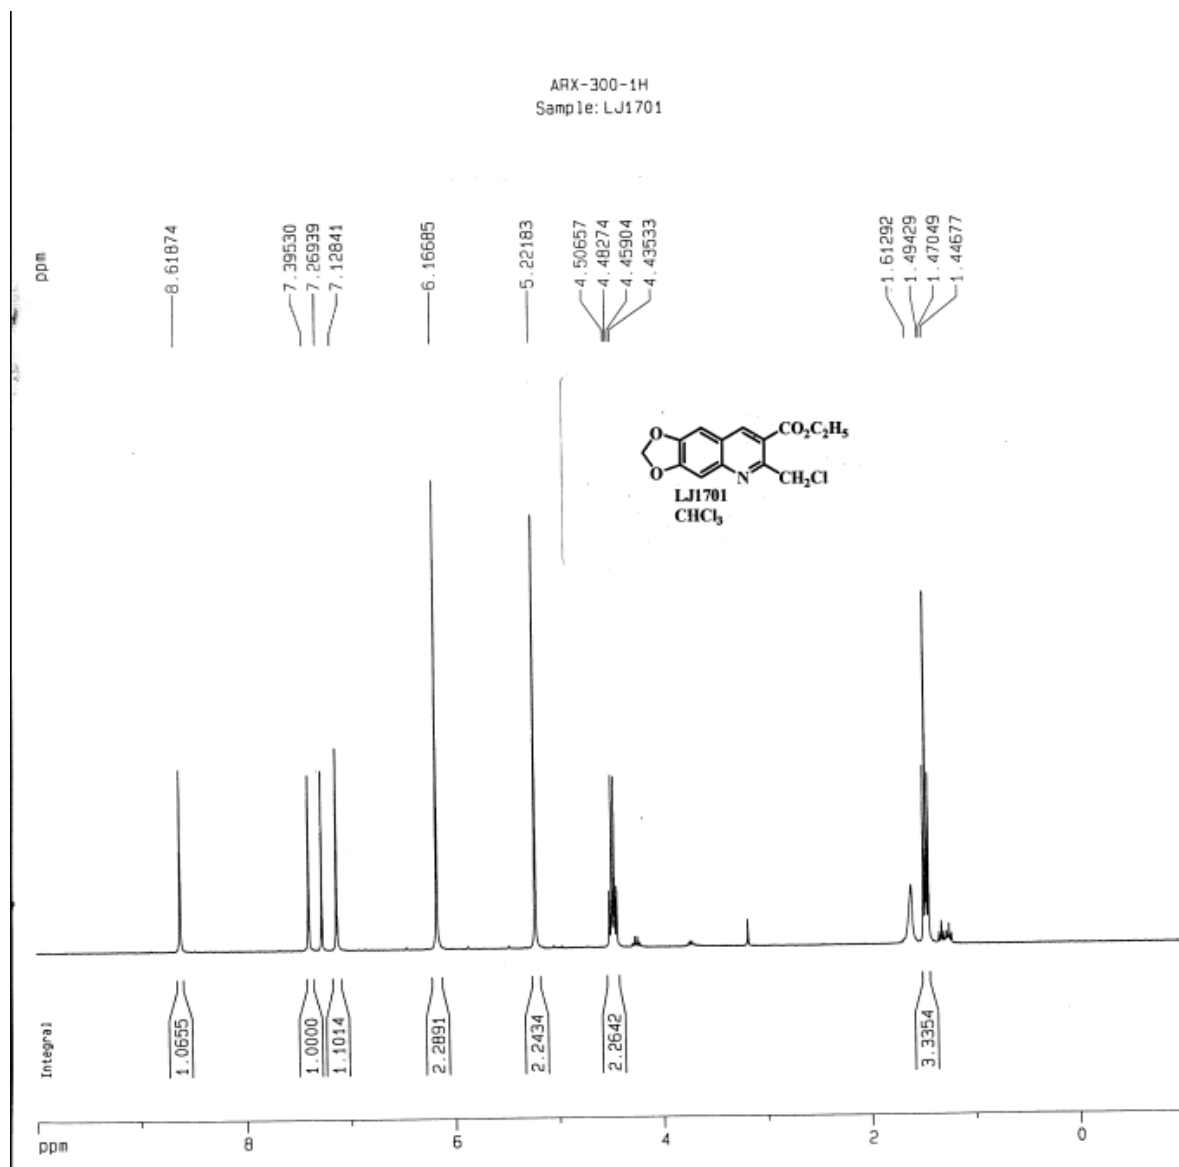

**Figure S1:**  $^1\text{H}$  NMR spectrum of compound **5**.

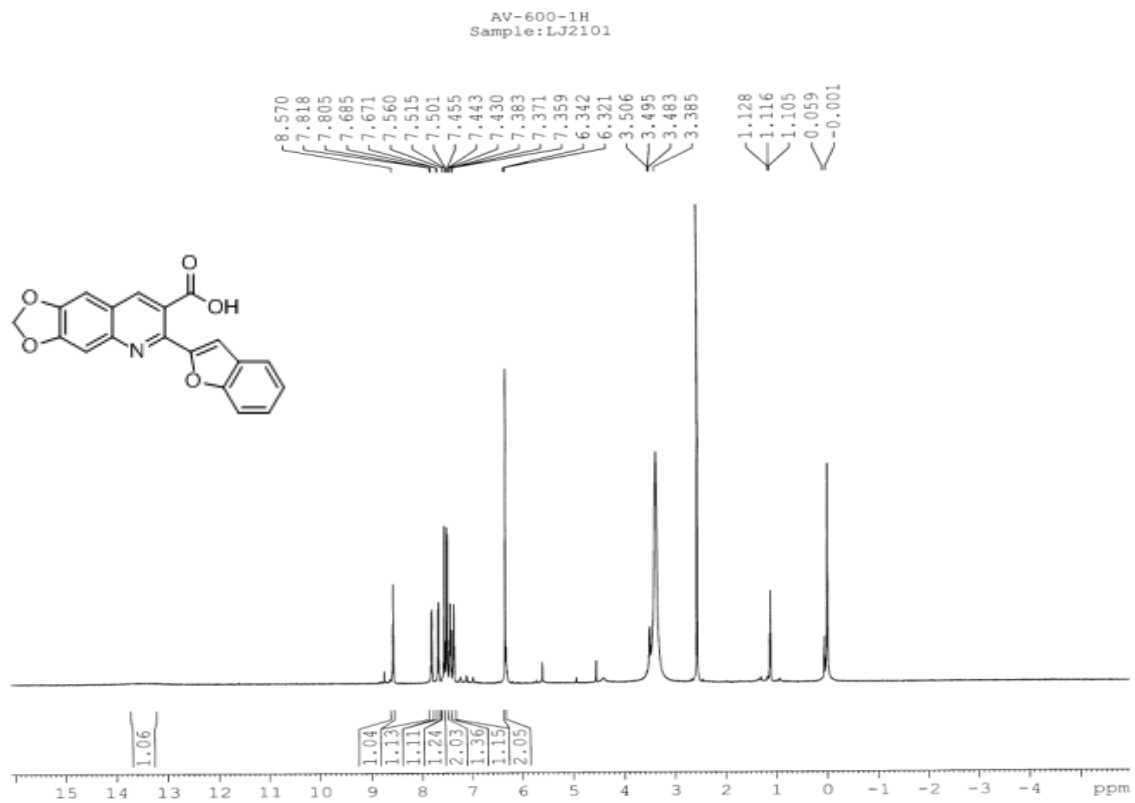

AV-600-13C  
Sample: LJ2101

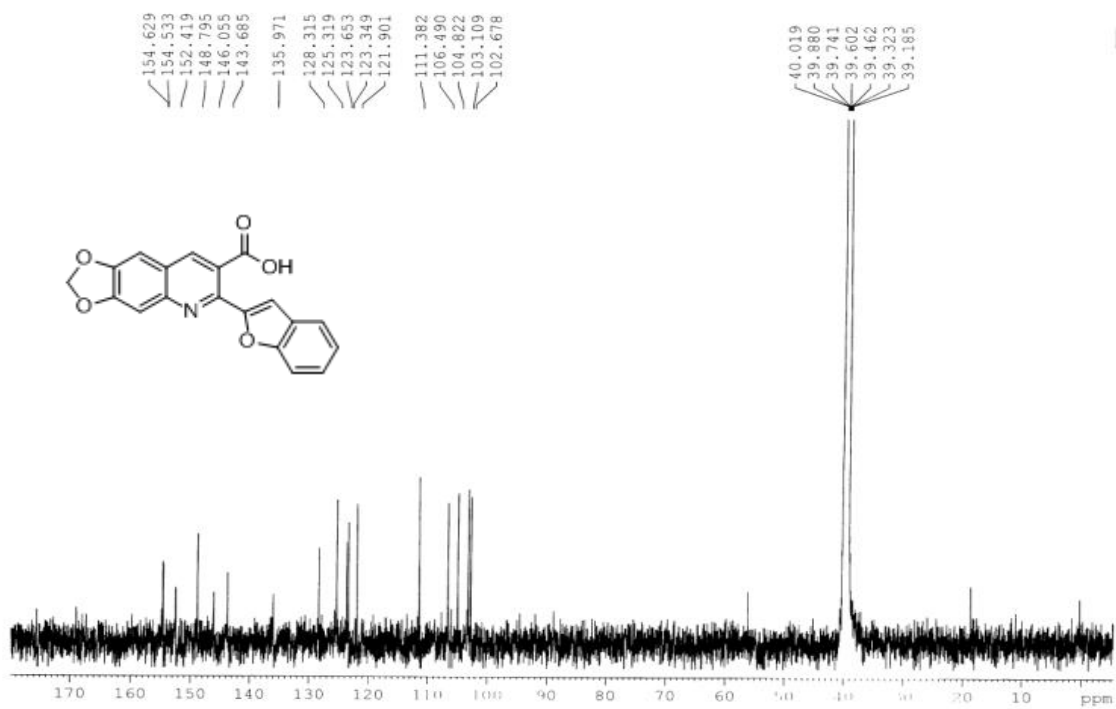

Figure S2:  $^1\text{H}$  NMR and  $^{13}\text{C}$  NMR spectra of **3a**.

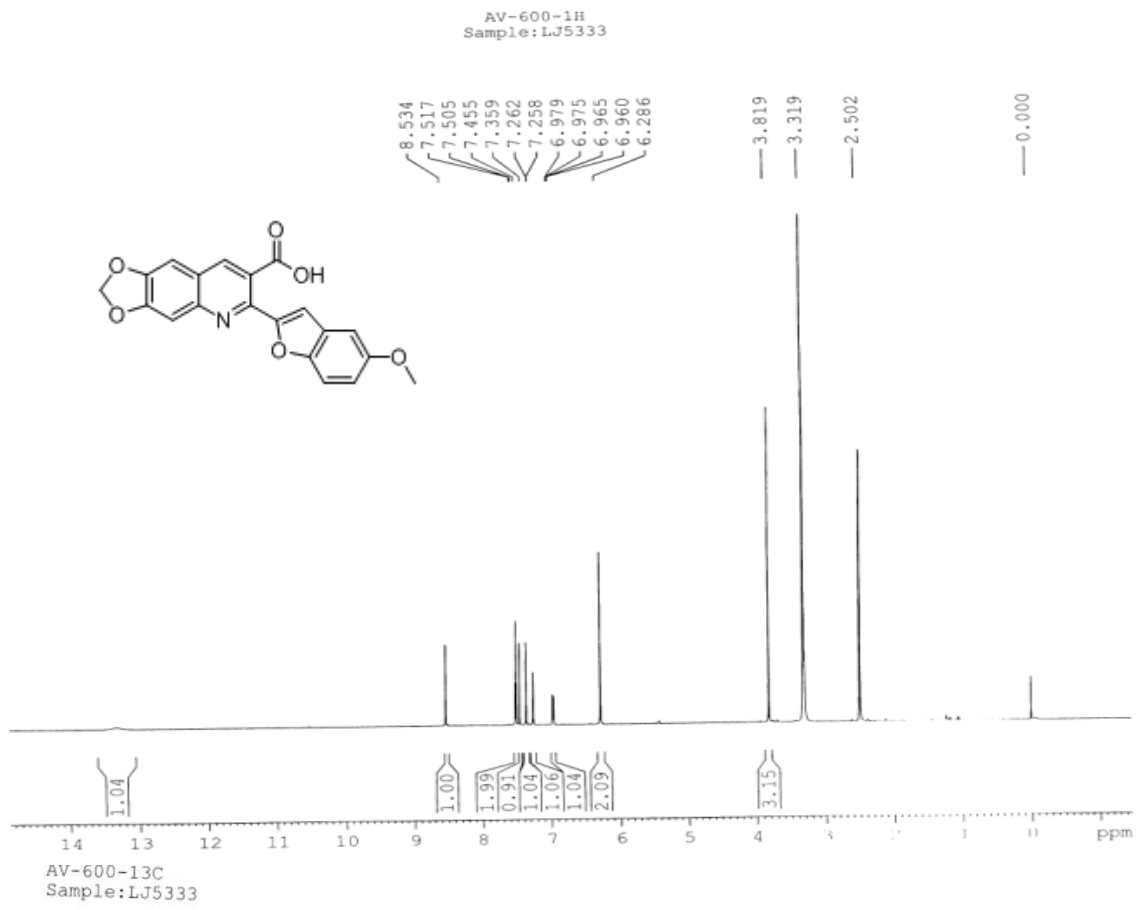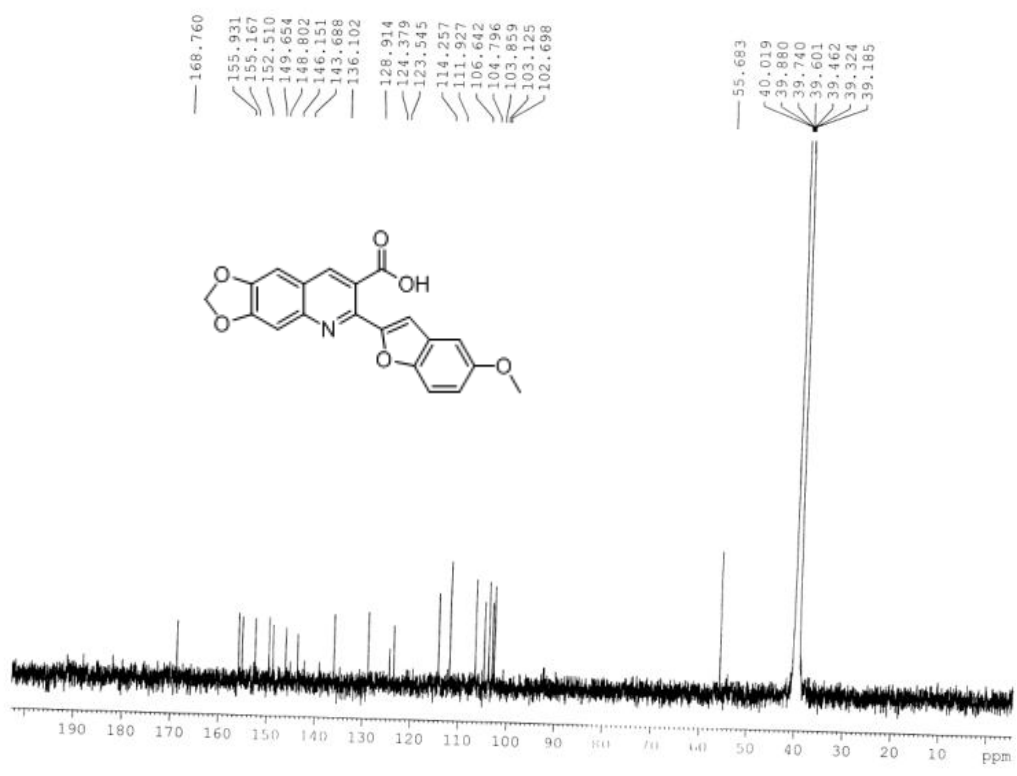

Figure S3: <sup>1</sup>H NMR and <sup>13</sup>C NMR spectra of **3b**.

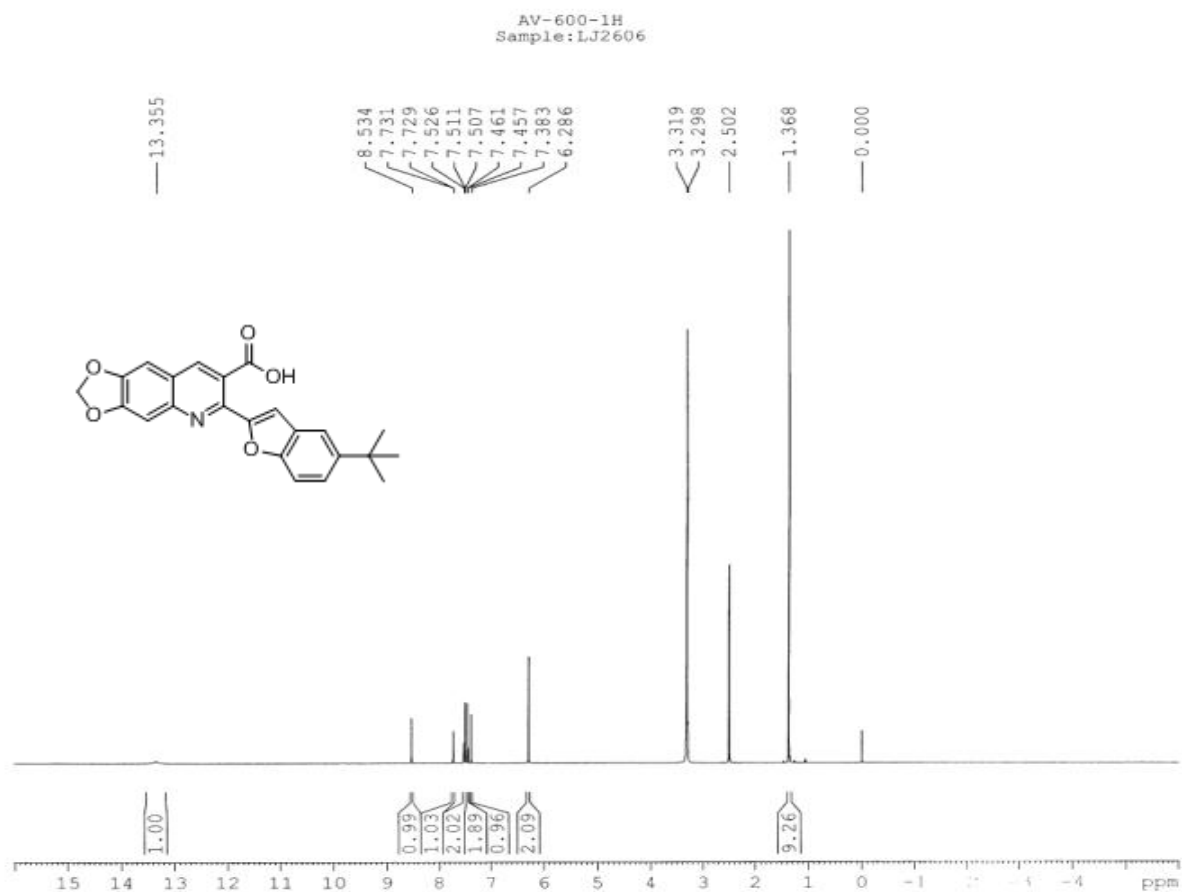

AV-600-13C  
Sample: LJ2606

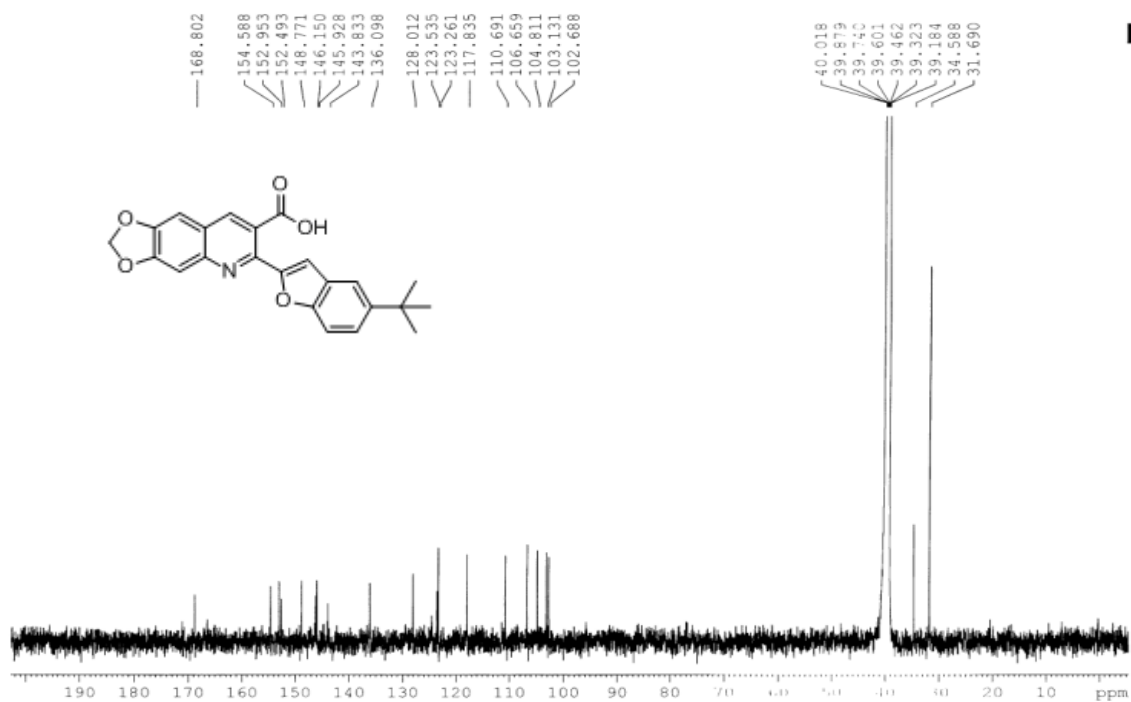

Figure S4:  $^1\text{H}$  NMR and  $^{13}\text{C}$  NMR spectra of 3c.

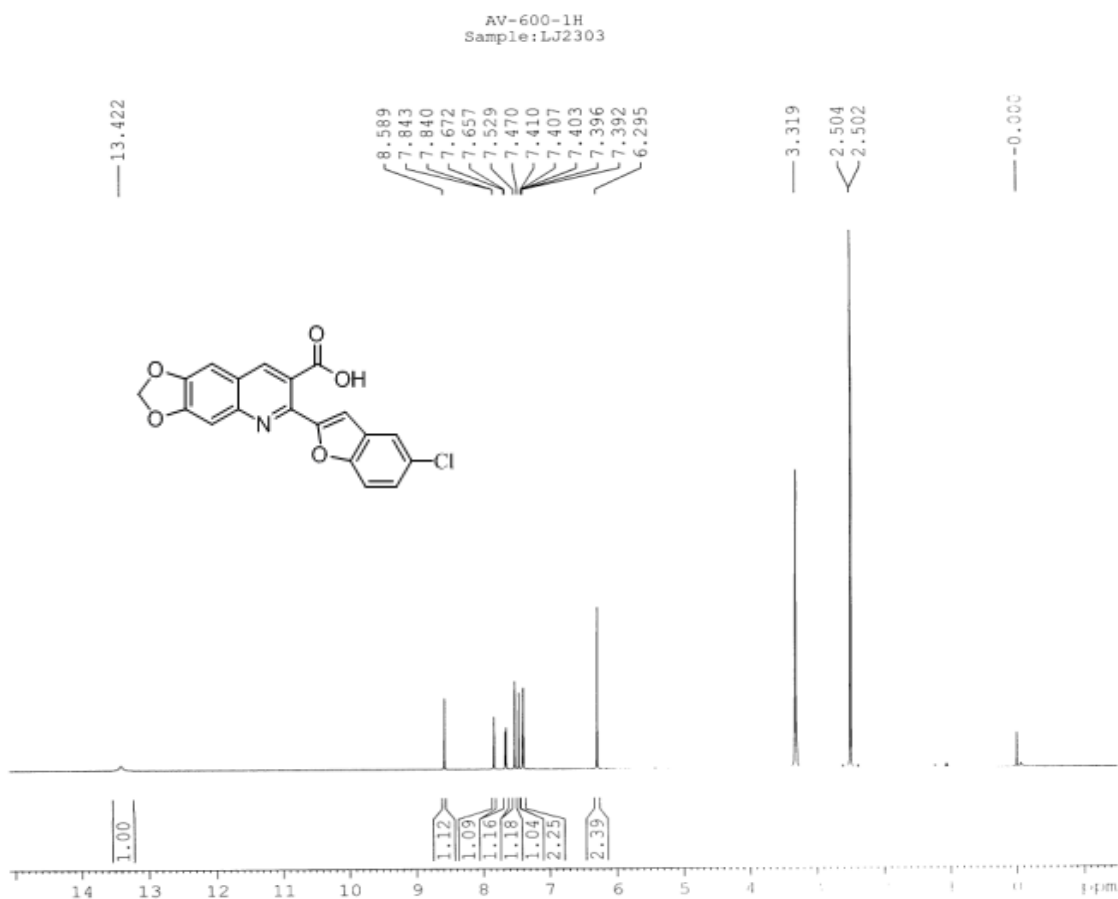

AV-600-13C  
Sample: LJ2303

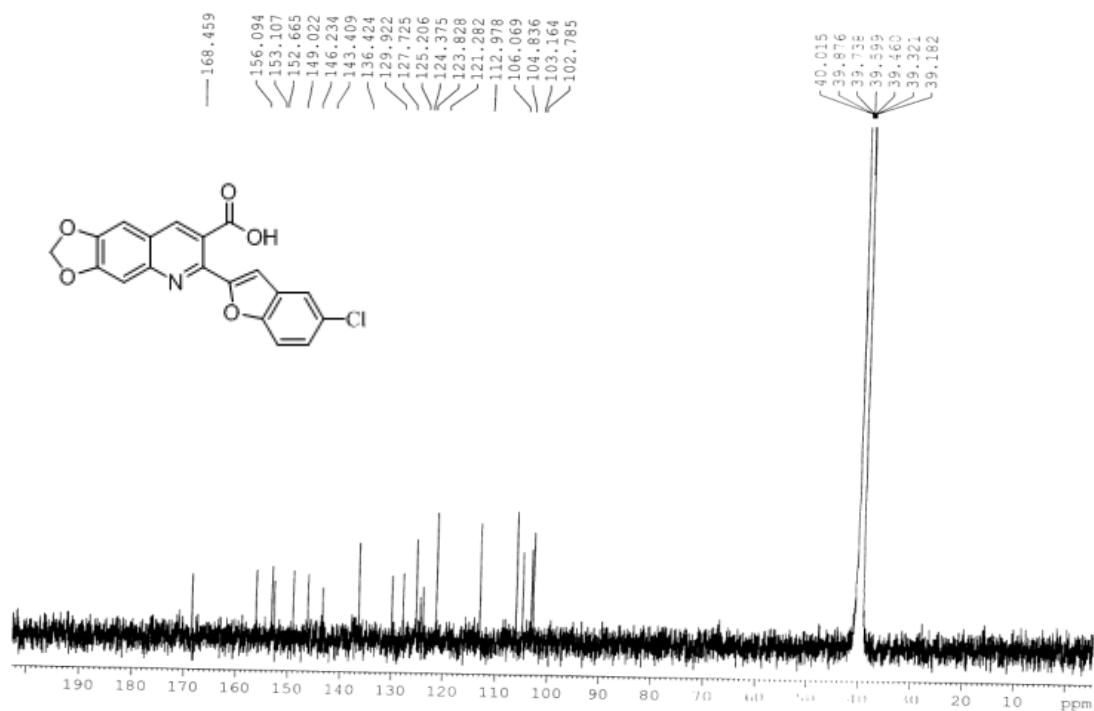

Figure S5:  $^1\text{H}$  NMR and  $^{13}\text{C}$  NMR spectra of **3d**.

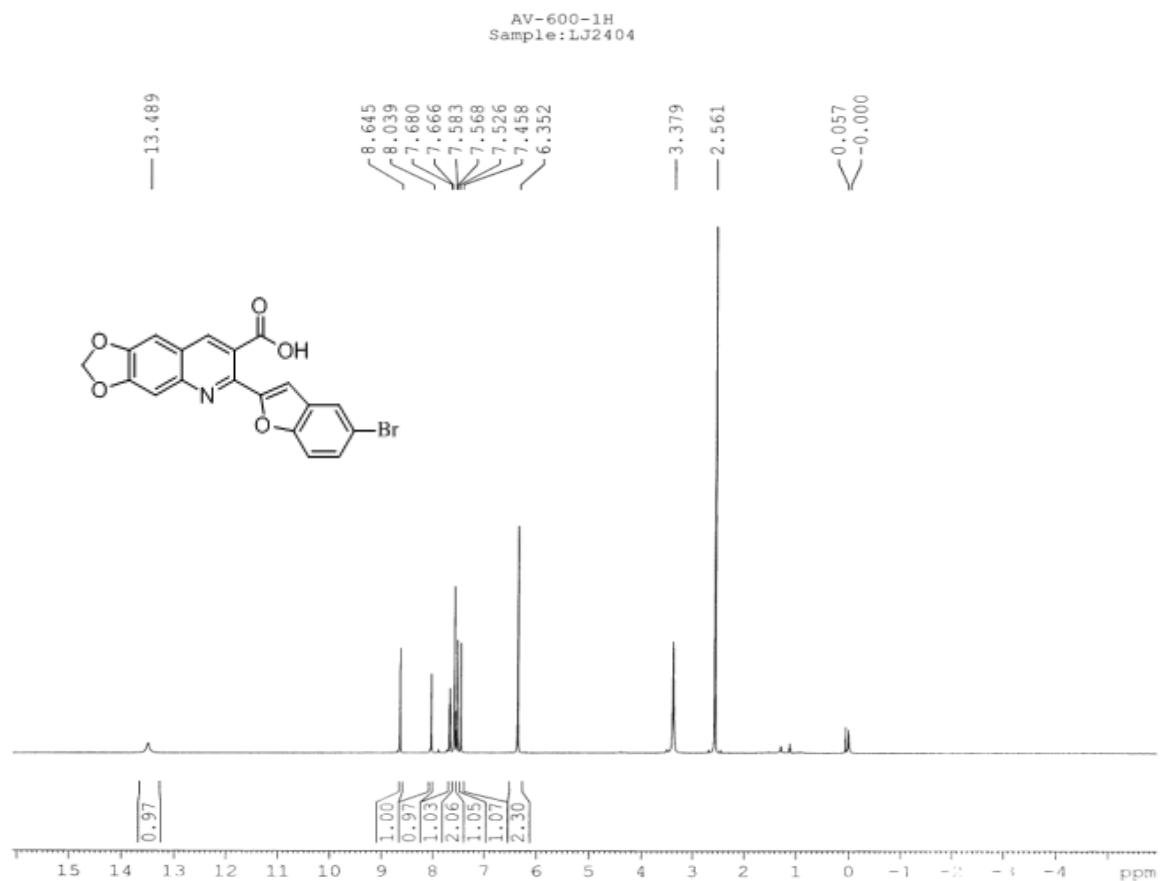

AV-600-13C  
Sample: LJ2404

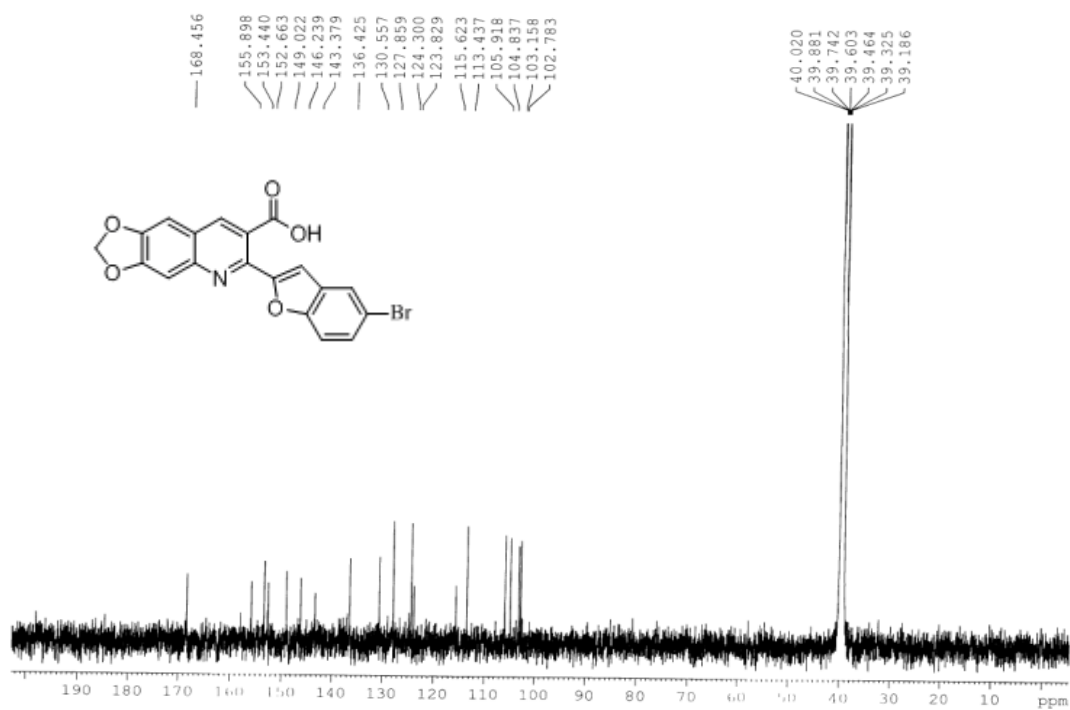

Figure S6:  $^1\text{H}$  NMR and  $^{13}\text{C}$  NMR spectra of **3e**.

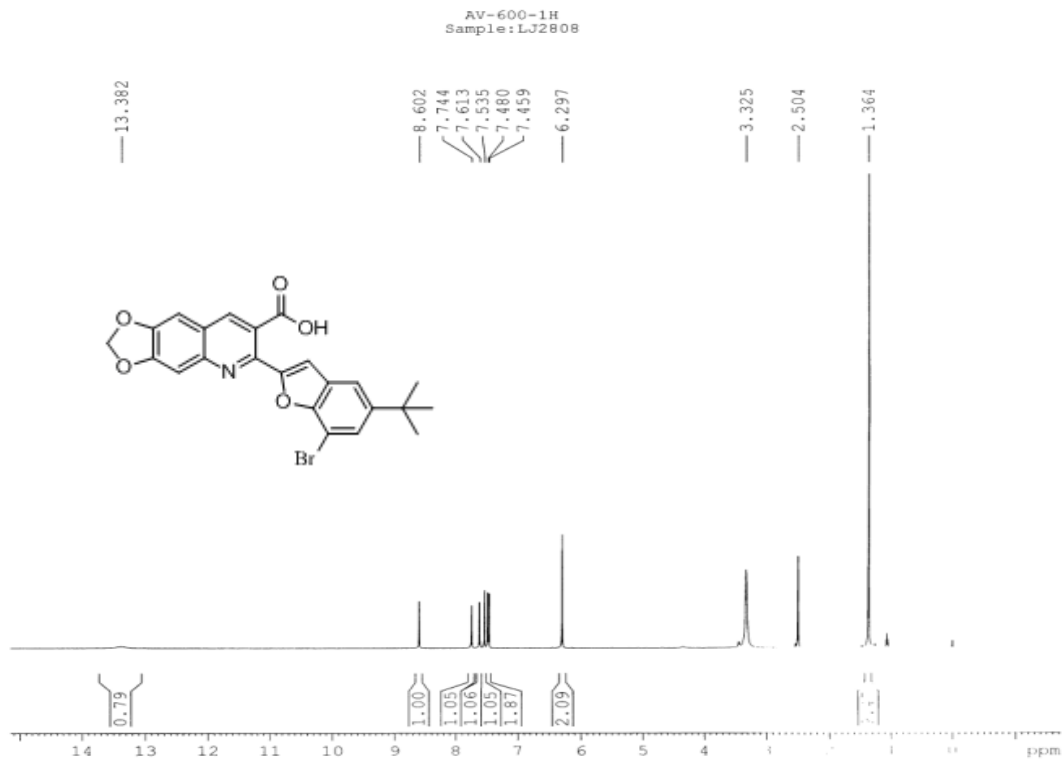

AV-600-13C  
Sample: LJ2808

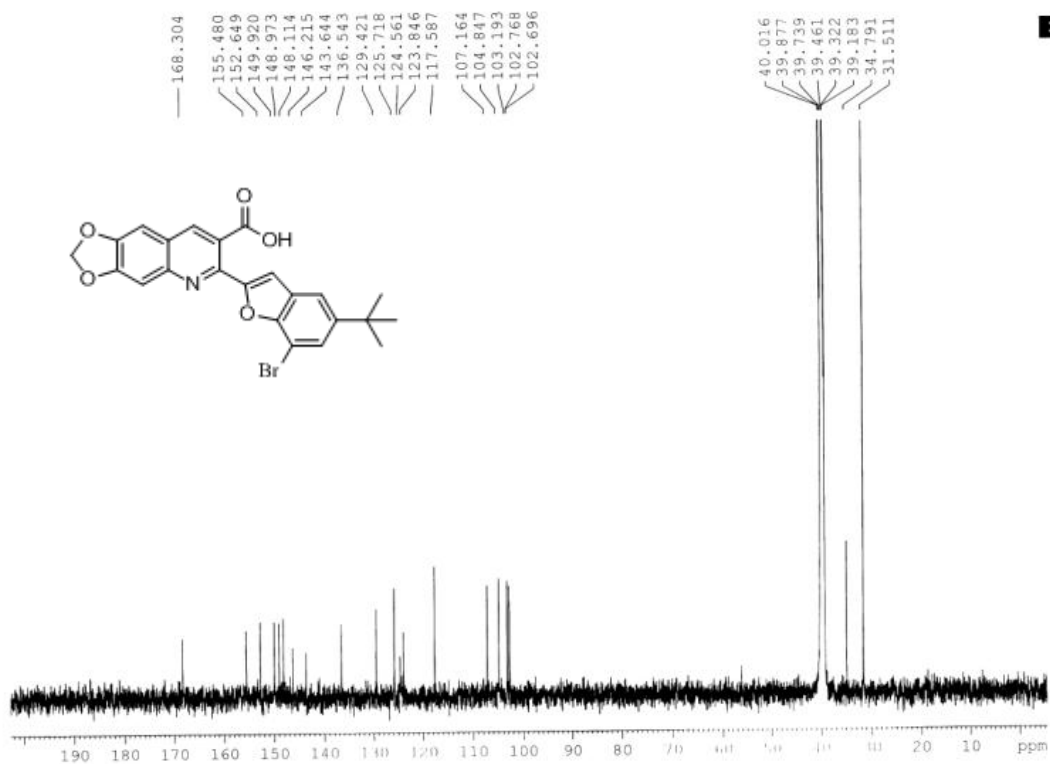

Figure S7:  $^1\text{H}$  NMR and  $^{13}\text{C}$  NMR spectra of 3f.



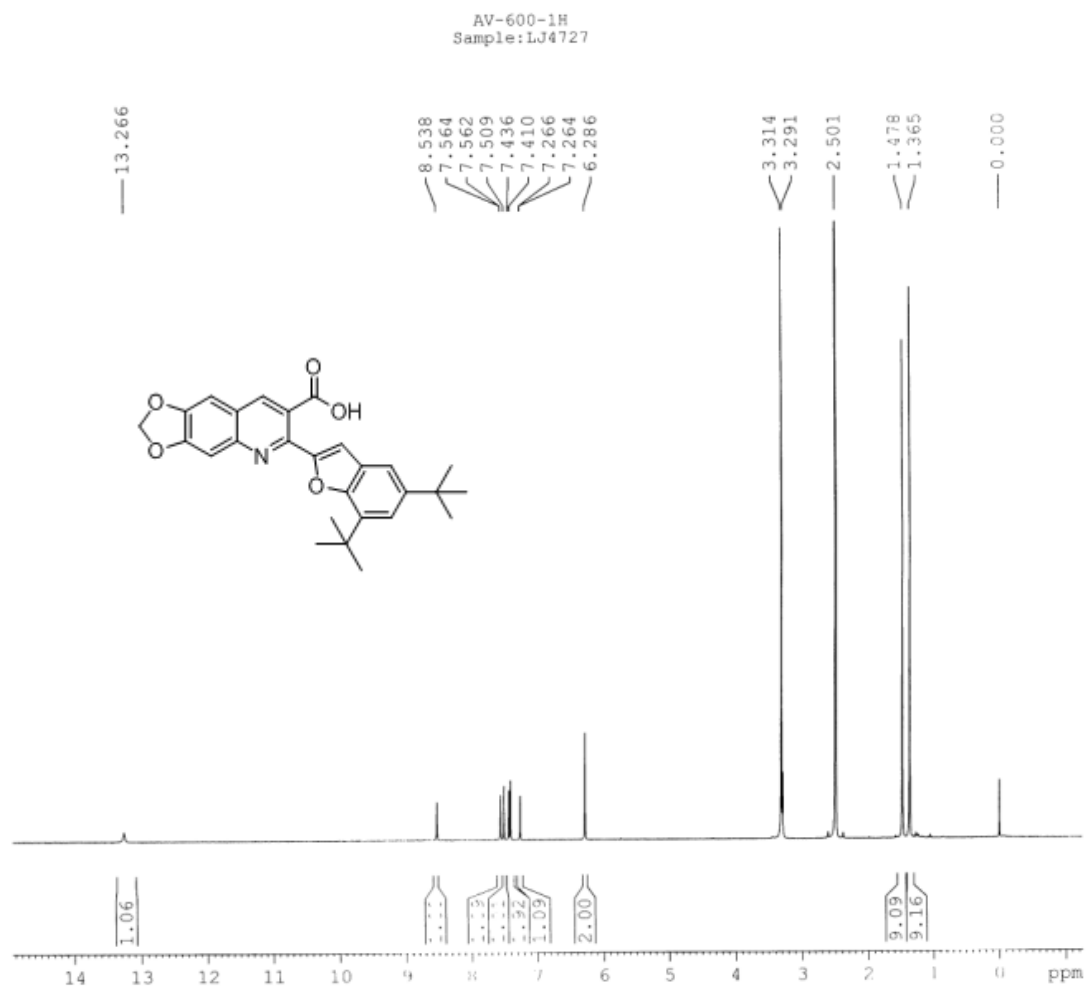

AV-600-13C  
Sample: LJ4727

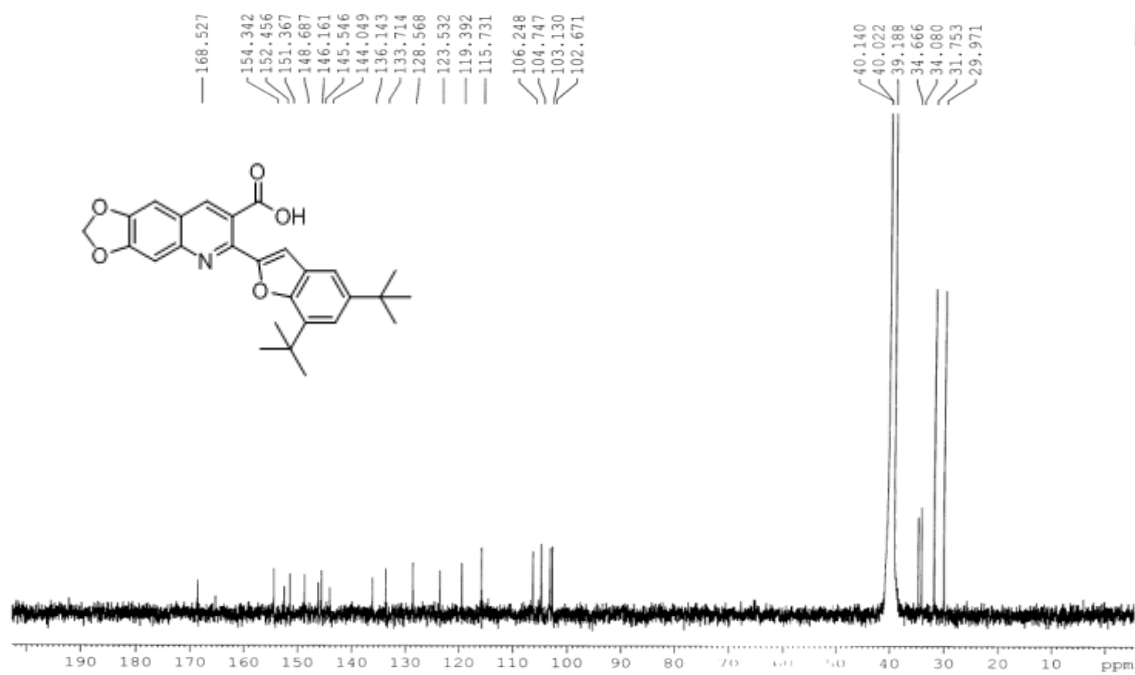

Figure S8:  $^1\text{H}$  NMR and  $^{13}\text{C}$  NMR spectra of **3g**.

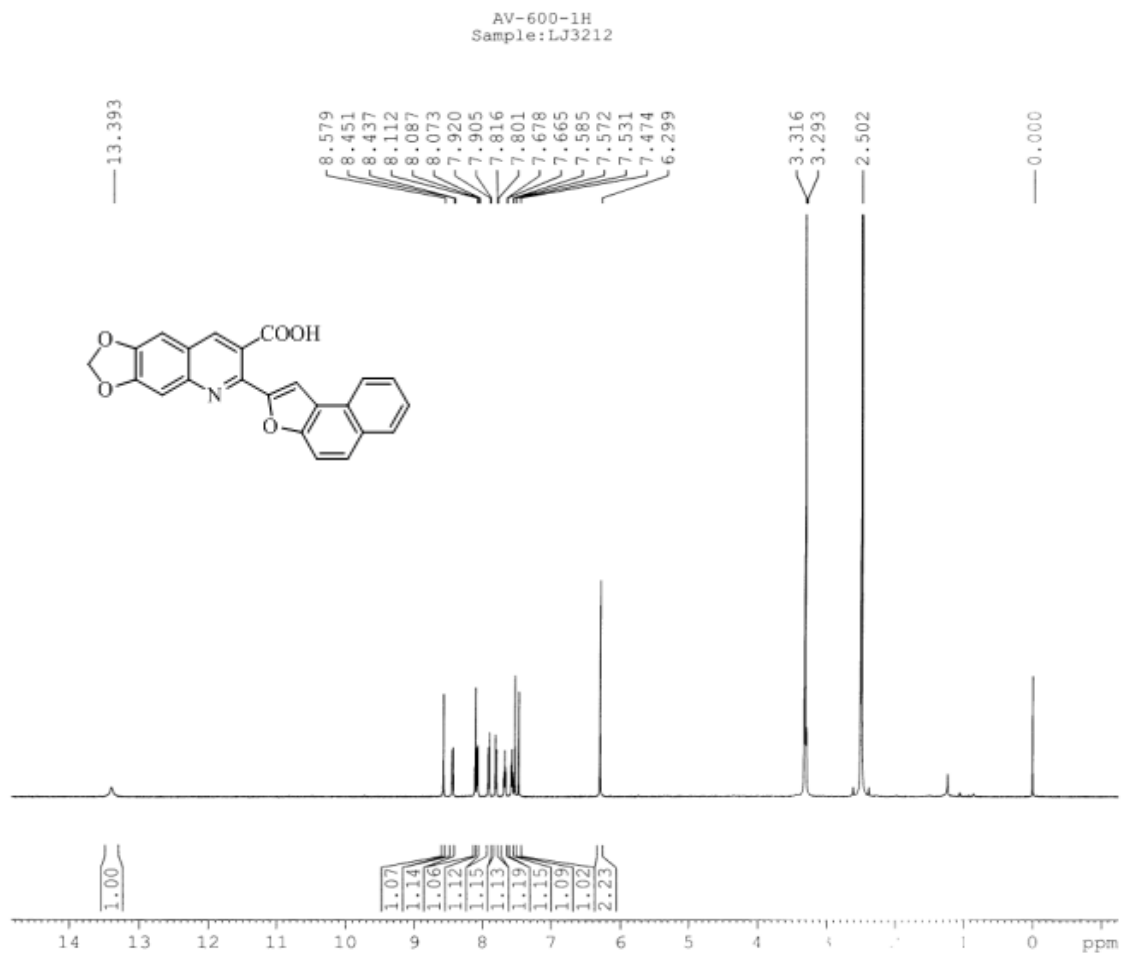

AV-600-13C  
Sample: LJ3212

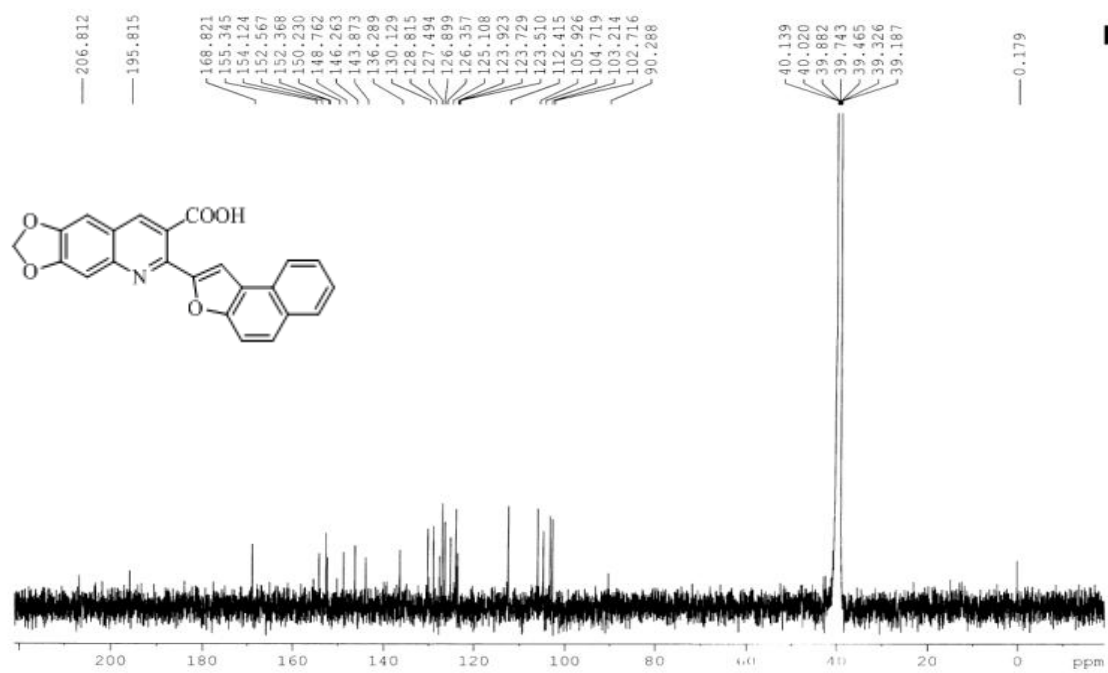

Figure S9:  $^1\text{H}$  NMR and  $^{13}\text{C}$  NMR spectra of **3h**.
